# Supplementary material
Source: publisher figshare collection journal article supplement (https://aacr.figshare.com/articles/dataset/_/23553171)
Supplement: Supplementary file 1 [file 41323680]

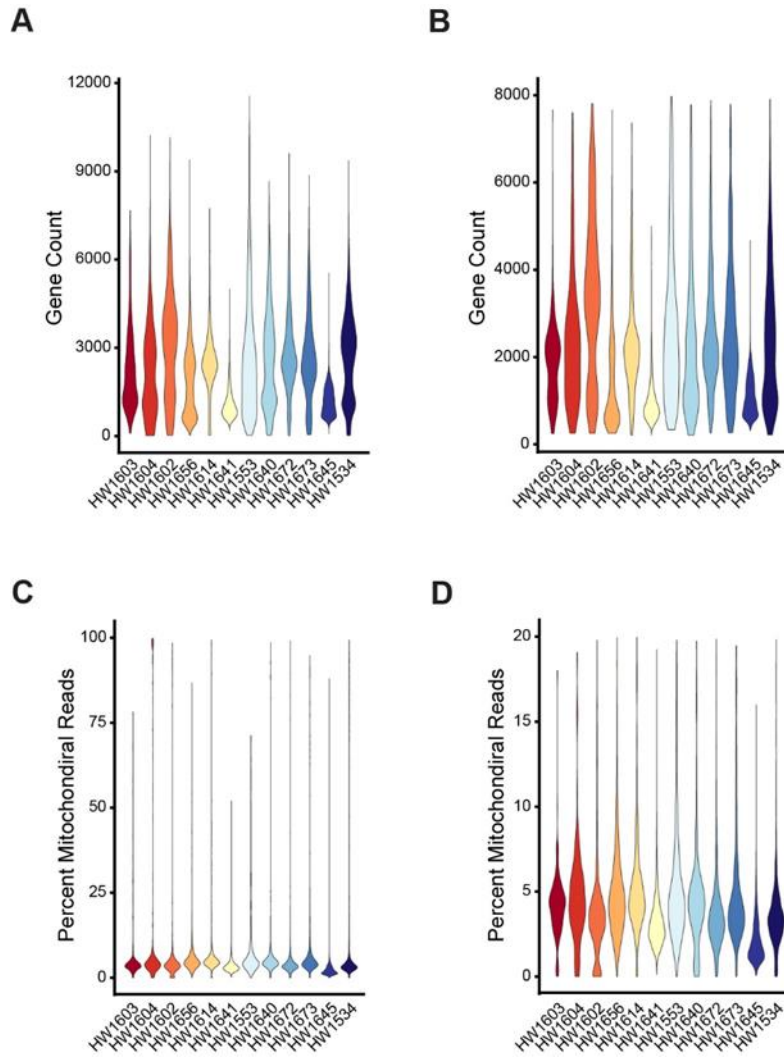

**Supplementary Figure S4 | Gene counts and filtering.** Gene counts for all sequenced cells (**A**) and after filtering (**B**) Percent mitochondrial counts per cell for all cells sequenced (**C**), and post-filtering (**D**).
